# Supplementary material
Source: Springer Nature journal article supplement (https://www.springermedizin.de/resource/supplementary/12874_2010_554_MOESM2_ESM.pdf/9432456)
Supplement: MOESM2 [file 9432456]

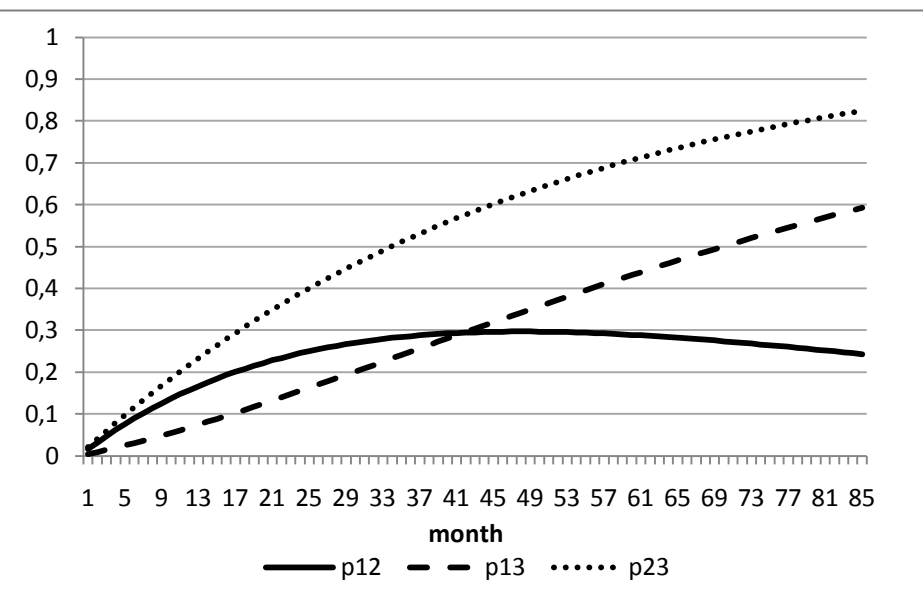

a) Male, aged  $\leq 65$  years, Charlson Index  $\leq 3$

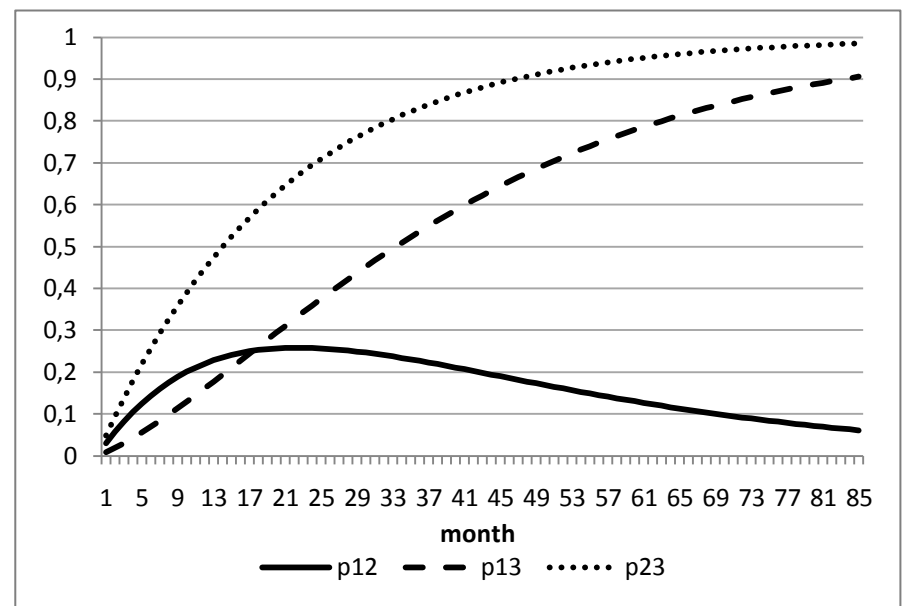

b) Male, aged  $> 65$  years, Charlson Index  $> 3$

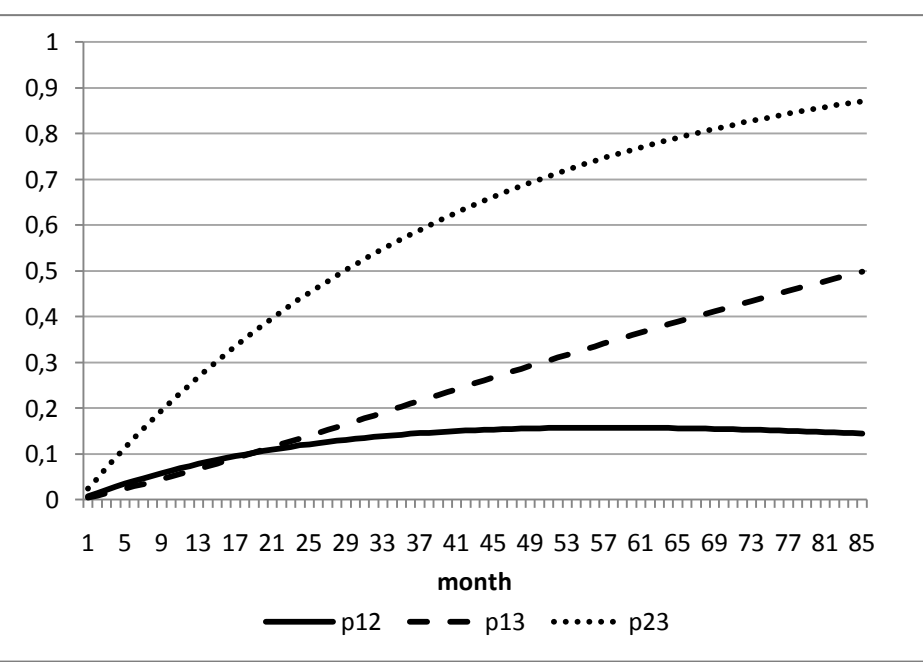

c) Female, aged  $\leq 65$  years, Charlson Index  $\leq 3$

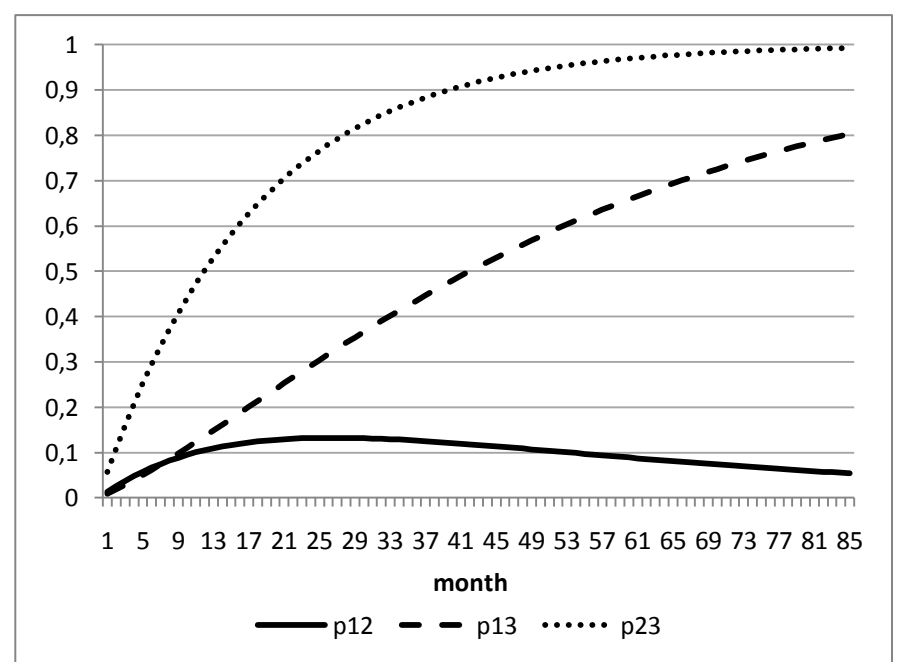

d) Female, aged  $> 65$  years, Charlson Index  $> 3$
